# Supplementary material
Source: ML conference proceedings conference paper supplement (https://proceedings.neurips.cc/paper_files/paper/2011/hash/2ac2406e835bd49c70469acae337d292-Abstract.html)
Supplement: Supplementary file 1 [file 2ac2406e835bd49c70469acae337d292-Supplemental.zip]

## A Margin upper bound

From (15) and (10)

$$L_M[y, f(x)] = \sum_{k=1}^M e^{-\frac{1}{2}[\langle f(x), y \rangle - \langle f(x), y^k \rangle]} \quad (39)$$

$$= 1 + \sum_{y^k \neq y}^M e^{-\frac{1}{2}[\langle f(x), y \rangle - \langle f(x), y^k \rangle]} \quad (40)$$

$$= 1 + e^{-\mathcal{M}(f(x), y)} \sum_{y^k \neq y} e^{-\frac{1}{2}[\langle f(x), y \rangle - \langle f(x), y^k \rangle] + \mathcal{M}(f(x), y)} \quad (41)$$

$$= 1 + e^{-\mathcal{M}(f(x), y)} \sum_{y^k \neq y} e^{-\frac{1}{2}[\max_{y^l \neq y} \langle f(x), y^l \rangle - \langle f(x), y^k \rangle]} \quad (42)$$

$$= 1 + e^{-\mathcal{M}(f(x), y)} \left[ 1 + \sum_{y^k \neq y, y^{l^*}} e^{-\frac{1}{2}[\langle f(x), y^{l^*} \rangle - \langle f(x), y^k \rangle]} \right] \quad (43)$$

$$\geq 1 + e^{-\mathcal{M}(f(x), y)} \quad (44)$$

where  $l^* = \arg \max_{y^l \neq y} \langle f(x), y^l \rangle$ .

## B Convexity

Defining  $\beta_k = P_{Y|X}(y^k|x)$  and using (13)

$$R(f|x) = E_{Y|X}\{L_M[y, f(x)]|x\} \quad (45)$$

$$= \sum_{k=1}^M \beta_k L_M[y^k, f(x)] \quad (46)$$

$$= \sum_{k=1}^M \beta_k \sum_{j=1}^M e^{-\frac{1}{2}\langle f(x), y^k - y^j \rangle} = \sum_{k=1}^M \sum_{j=1}^M \beta_k e^{-\frac{1}{2}\langle f(x), y^k - y^j \rangle}. \quad (47)$$

Denoting  $\eta_{i,j} = y^i - y^j$  the functional derivatives of first and second order, with respect to  $f(x)$ , are

$$\frac{\partial R(f|x)}{\partial f(x)} = -\frac{1}{2} \sum_{k=1}^M \sum_{j=1}^M \beta_k \eta_{k,j} e^{-\frac{1}{2}\langle f(x), \eta_{k,j} \rangle} \quad (48)$$

$$\frac{\partial^2 R(f|x)}{\partial f(x)^2} = \frac{1}{4} \sum_{k=1}^M \sum_{j=1}^M \beta_k [\eta_{k,j} \eta_{k,j}^T] e^{-\frac{1}{2}\langle f(x), \eta_{k,j} \rangle}. \quad (49)$$

If all codewords are different, i.e.  $\eta_{k,j} \neq 0 \forall k, j$ , the matrices  $[\eta_{k,j} \eta_{k,j}^T]$  are positive definite  $\forall k, j$ . Since  $\beta_k \geq 0 \forall k$  and  $\sum_{k=1}^M \beta_k = 1$ ,  $\beta_j > 0$  for at least one  $j$  and (49) is strictly positive definite. Hence,  $R(f|x)$  is strictly convex, and has a *unique* global minimum.

## C Bayes Consistency

Using  $\beta_k = P_{Y|X}(y^k|x)$ , setting

$$e^{-\frac{1}{2}\langle f(x), \eta_{k,j} \rangle} = \sqrt{\frac{\beta_j}{\beta_k}} \quad (50)$$

and substituting in (48)

$$\frac{\partial R(f|x)}{\partial f(x)} = -\frac{1}{2} \sum_{k=1}^M \sum_{j=1}^M \beta_k \eta_{k,j} \sqrt{\frac{\beta_j}{\beta_k}} \quad (51)$$

$$= -\frac{1}{2} \sum_{k=1}^M \sum_{j=1}^M (y^k - y^j) \sqrt{\beta_j \beta_k} \quad (52)$$

$$= -\frac{1}{2} \sum_{k=1}^M y^k \sqrt{\beta_k} \sum_{j=1}^M \sqrt{\beta_j} + \frac{1}{2} \sum_{j=1}^M y^j \sqrt{\beta_j} \sum_{k=1}^M \sqrt{\beta_k} = 0 \quad (53)$$

Hence, when  $f(x)$  is  $f^*(x)$ , the unique minimum of  $R(f|x)$ , (50) holds. It follows that

$$\langle f^*(x), y^i \rangle - \langle f^*(x), y^k \rangle = \log \frac{P_{Y|X}(y^i|x)}{P_{Y|X}(y^k|x)} \quad (54)$$

and

$$\langle f^*(x), y^i \rangle = \log P_{Y|X}(y^i|x) + c, \forall i \quad (55)$$

for some constant  $c$ . This shows that (11) is equivalent to (18).

## D Underdetermined predictor

Let  $d > M - 1$  and consider a set of  $M$  vectors  $y^1, \dots, y^M \in \mathbb{R}^d$ . There are three possibilities

1. If  $d > M$  then  $y^1, \dots, y^M$  belong to an at most  $M$  dimensional subspace  $\mathcal{S}$  of  $\mathbb{R}^d$ .  $\mathcal{S}'$ , the orthogonal complement of  $\mathcal{S}$ , is nonempty and  $\mathbb{R}^d = \mathcal{S}' \cup \mathcal{S}$ . Since, by definition

$$\forall u \in \mathcal{S}, v \in \mathcal{S}', \quad \langle u, v \rangle = 0, \quad (56)$$

any  $v \in \mathcal{S}'$  satisfies (20).

2. If  $d = M$  and  $y^1, \dots, y^M$  are linearly dependent, then  $y^1, \dots, y^M$  belong to an, at most,  $M - 1$  dimensional subspace  $\mathcal{S}$  of  $\mathbb{R}^M$ . It follows that  $\mathcal{S}'$ , the orthogonal complement of  $\mathcal{S}$ , is nonempty. As in the previous case, this implies the existence of a  $v \in \mathcal{S}'$  that satisfies (20).
3. If  $d = M$  and  $y^1, \dots, y^M \in \mathbb{R}^M$  are linearly independent, then, the matrix  $Y$  of rows  $y^1, \dots, y^M$  is invertible and

$$Yv = \mathbf{1}, \quad (57)$$

with  $\mathbf{1} = [1, \dots, 1]^T \in \mathbb{R}^M$ , has a unique solution. This solution satisfy (20) since

$$\langle y^i, v \rangle = 1 \quad \forall i \quad (58)$$

## E Solving optimization problem of codewords

**Lemma 1.** Consider the set of distinct unit vectors  $y^1, \dots, y^M \in \mathbb{R}^{M-1}$  of smallest pairwise distance

$$d_{min}^2 = \min_{i \neq j} \|y^i - y^j\|^2. \quad (59)$$

Then

$$d_{min}^2 \leq \frac{2M}{(M-1)} \quad (60)$$

*Proof.* Since the minimum distance cannot be larger than the average distance between the vectors,

$$d_{min}^2 \leq \frac{2}{M(M-1)} \sum_i \sum_{j \neq i} \|y^i - y^j\|^2. \quad (61)$$

To derive the bound of (60), we consider the following problem.

$$\begin{cases} \max y^1, \dots, y^M & \frac{1}{2} \sum_i \sum_{j \neq i} \|y^i - y^j\|^2 \\ \text{s.t.} & \|y^k\| = 1 \quad \forall k = 1..M. \end{cases} \quad (62)$$

This problem can be solved with the Lagrange multiplier method. The Lagrangian is

$$\mathcal{L} = \frac{1}{2} \sum_i \sum_{j \neq i} \|y^i - y^j\|^2 - \sum_i \sigma_i (\|y^i\|^2 - 1) \quad (63)$$

for which

$$\frac{\partial \mathcal{L}}{\partial y^k} = - \sum_{i \neq k} (y^i - y^k) + \sum_{i \neq k} (y^k - y^i) - 2\sigma_k y^k = 2y^k(M - \sigma_k) - 2 \sum_{i=1}^M y^i \quad (64)$$

$$\frac{\partial^2 \mathcal{L}}{\partial y^{k2}} = 2(M - \sigma_k - 1). \quad (65)$$

This has a maximum when

$$y^k(M - \sigma_k) = \sum_{i=1}^M y^i \quad (66)$$

$$M - \sigma_k \leq 1 \quad (67)$$

We next consider two possibilities for  $M - \sigma_k$ .

1.  $\exists k$  such that  $M - \sigma_k = 0$ . In this case, it follows from (66) that  $\sum_{i=1}^M y^i = 0$ . Since  $\|y^k\| = 1$ , it follows that  $M - \sigma_k = 0 \forall k$ .
2.  $M - \sigma_k \neq 0 \forall k$ . Then, from (66)

$$y^k = \frac{\sum_{i=1}^M y^i}{M - \sigma_k}, \forall k. \quad (68)$$

Since the  $y^k$  have to be distinct, there can be no pair such that  $M - \sigma_{k_1} = M - \sigma_{k_2}$ . Using  $\|y^k\| = 1$ , it follows from (68) that

$$(M - \sigma_k)^2 = \left\| \sum_{i=1}^M y^i \right\|^2 \quad (69)$$

and, for any  $k$ ,

$$(M - \sigma_k) \in \left\{ -\left\| \sum_{i=1}^M y^i \right\|, \left\| \sum_{i=1}^M y^i \right\| \right\}. \quad (70)$$

Hence, there is a contradiction for  $M > 2$ . For  $M = 2$  the contradiction can be avoided if  $M - \sigma_{k_1} = -(M - \sigma_{k_2})$ . In this case, using (68),

$$\sum_{i=1}^M y^i = y^1 + y^2 = \left[ \frac{1}{M - \sigma_{k_1}} + \frac{1}{M - \sigma_{k_2}} \right] \sum_{i=1}^M y^i = 0 \quad (71)$$

Since  $\|y^k\| = 1$ , it follows from (66) that  $M - \sigma_k = 0 \forall k$ , contradicting the initial hypothesis that  $M - \sigma_k \neq 0 \forall k$ .

In summary, the Lagrangian is maximum when

$$\sum_{i=1}^M y^i = 0 \quad (72)$$

$$\sigma_k = M, \forall k. \quad (73)$$

Taking the dot product of both sides of (72) with  $y^k$  and using the fact that  $\|y^k\| = 1$ ,

$$\sum_{j \neq k} \langle y^j, y^k \rangle = -1. \quad (74)$$

Combining with the fact that  $\|y^i - y^j\|^2 = 2 - 2 \langle y^i, y^j \rangle$  it follows that

$$\sum_i \sum_{j \neq i} \|y^i - y^j\|^2 = 2M(M-1) - 2 \sum_i \sum_{j \neq i} \langle y^i, y^j \rangle \quad (75)$$

$$= 2M^2 \quad (76)$$

Combining this with (61) leads to (60)

**Theorem 2.** Any set of unit vectors  $y^1, \dots, y^M \in \mathbb{R}^{M-1}$  which form a regular simplex in  $\mathbb{R}^{M-1}$  is a solution of (19)

*Proof.* From Lemma 1, if  $d_{min}^2 = \min_{i \neq j} \|y^i - y^j\|^2$  then

$$d_{min}^2 \leq \frac{2M}{(M-1)}. \quad (77)$$

Since the pairwise distances between the vertices of a regular unit simplex in  $\mathbb{R}^{M-1}$  are all equal to  $\sqrt{\frac{2M}{(M-1)}}$  [3], the set of these vertices achieves the upper bound of (77). Hence, this set is a solution to (19). Note that this solution is not unique, since any rotation of the simplex is an equally valid solution.

## F Derivation of CD-MCBoost

From (13) and (22)

$$-\delta R[f^t; j, g] = - \frac{\partial}{\partial \epsilon} \sum_{i=1}^n L_M[y_i, f^t(x_i) + \epsilon g(x_i) \mathbf{1}_j] \Big|_{\epsilon=0} \quad (78)$$

$$= - \sum_{i=1}^n \frac{\partial L_M[y_i, f^t(x_i) + \epsilon g(x_i) \mathbf{1}_j]}{\partial \epsilon} \Big|_{\epsilon=0} \quad (79)$$

$$= - \sum_{i=1}^n \frac{\partial}{\partial \epsilon} \sum_{k=1}^M e^{-\frac{1}{2} \langle f^t(x_i) + \epsilon g(x_i) \mathbf{1}_j, y_i - y^k \rangle} \Big|_{\epsilon=0} \quad (80)$$

$$= - \sum_{i=1}^n \sum_{k=1}^M \left[ \frac{\partial}{\partial \epsilon} e^{-\frac{1}{2} \epsilon g(x_i) \langle \mathbf{1}_j, y_i - y^k \rangle} \right] e^{-\frac{1}{2} \langle f^t(x_i), y_i - y^k \rangle} \Big|_{\epsilon=0} \quad (81)$$

$$= \frac{1}{2} \sum_{i=1}^n \sum_{k=1}^M g(x_i) \langle \mathbf{1}_j, y_i - y^k \rangle e^{-\frac{1}{2} \langle f^t(x_i), y_i - y^k \rangle} \quad (82)$$

$$= \frac{1}{2} \sum_{i=1}^n g(x_i) \sum_{k=1}^M \langle \mathbf{1}_j, y_i - y^k \rangle e^{-\frac{1}{2} \langle f^t(x_i), y_i - y^k \rangle} \quad (83)$$

$$= \sum_{i=1}^n g(x_i) w_i^j \quad (84)$$

where

$$w_i^j = \frac{1}{2} \sum_{k=1}^M \langle \mathbf{1}_j, y_i - y^k \rangle e^{-\frac{1}{2} \langle f^t(x_i), y_i - y^k \rangle} \quad (85)$$

$$= \frac{1}{2} e^{-\frac{1}{2} \langle f^t(x_i), y_i \rangle} \sum_{k=1}^M \langle \mathbf{1}_j, y_i - y^k \rangle e^{\frac{1}{2} \langle f^t(x_i), y^k \rangle}. \quad (86)$$

## G Derivation of GD-MCBoost

Using (13) and (29)

$$-\delta R[f^t; g] = -\frac{\partial}{\partial \epsilon} \sum_{i=1}^n L_M[y_i, f^t(x_i) + \epsilon g(x_i)] \Big|_{\epsilon=0} \quad (87)$$

$$= -\sum_{i=1}^n \frac{\partial L_M[y_i, f^t(x_i) + \epsilon g(x_i)]}{\partial \epsilon} \Big|_{\epsilon=0} \quad (88)$$

$$= -\sum_{i=1}^n \frac{\partial}{\partial \epsilon} \sum_{k=1}^M e^{-\frac{1}{2} \langle f^t(x_i) + \epsilon g(x_i), y_i - y^k \rangle} \Big|_{\epsilon=0} \quad (89)$$

$$= -\sum_{i=1}^n \sum_{k=1}^M \left[ \frac{\partial}{\partial \epsilon} e^{-\frac{1}{2} \langle g(x_i), y_i - y^k \rangle} \right] e^{-\frac{1}{2} \langle f^t(x_i), y_i - y^k \rangle} \Big|_{\epsilon=0} \quad (90)$$

$$= \frac{1}{2} \sum_{i=1}^n \sum_{k=1}^M \langle g(x_i), y_i - y^k \rangle e^{-\frac{1}{2} \langle f^t(x_i), y_i - y^k \rangle} \quad (91)$$

$$= \frac{1}{2} \sum_{i=1}^n \langle g(x_i), \sum_{k=1}^M (y_i - y^k) e^{-\frac{1}{2} \langle f^t(x_i), y_i - y^k \rangle} \rangle \quad (92)$$

$$= \sum_{i=1}^n \langle g(x_i), w_i \rangle \quad (93)$$

where

$$w_i = \frac{1}{2} \sum_{k=1}^M (y_i - y^k) e^{-\frac{1}{2} \langle f^t(x_i), y_i - y^k \rangle} \quad (94)$$

$$= \frac{1}{2} e^{-\frac{1}{2} \langle f^t(x_i), y_i \rangle} \sum_{k=1}^M (y_i - y^k) e^{\frac{1}{2} \langle f^t(x_i), y^k \rangle} \quad (95)$$
